# Supplementary material
Source: publisher site journal article supplement (http://www.kjim.org/upload/media/kjim-2021-409-suppl3.pdf)
Supplement: Supplementary file 1 [file kjim-2021-409-suppl3.pdf]

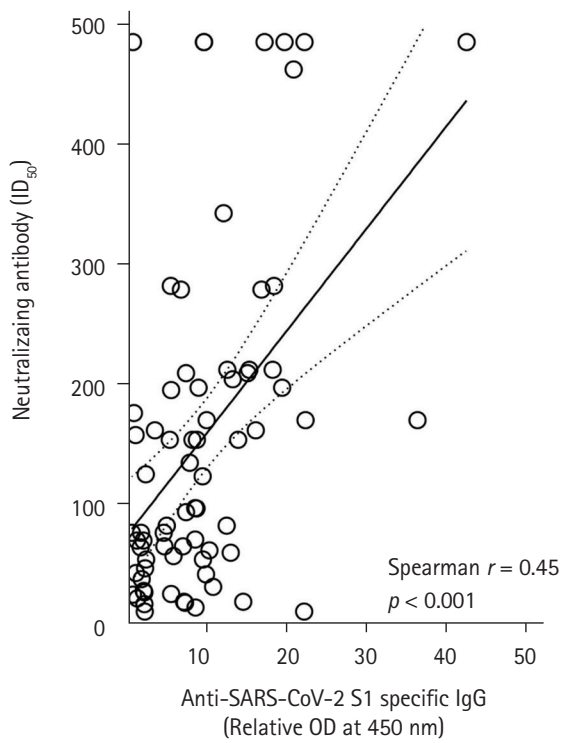

**Supplementary Figure 2.** Correlation between enzyme-linked immunosorbent assay of anti-severe acute respiratory syndrome coronavirus-2 (SARS-CoV-2) S1 immunoglobulin G (IgG) and microneutralization assay of the neutralizing antibody. ID, inhibitory dilution; OD, optical density.
